# Supplementary material
Source: HighWire-hosted journal article supplement (https://ez-admanager.com/highwire/filestream/156269/field_highwire_adjunct_files/0/batra_1390.pdf)
Supplement: batra_1390.pdf [file batra_1390.pdf]

# Errores diagnósticos en enfermedad cerebrovascular

## ¿Qué nos falta?

Ayush Batra, MD  
Galen V. Henderson,  
MD

Correspondencia y solicitud de separatas al Dr. Henderson: ghenderson@BWH.Harvard.edu

*Neurology*® 2017;88:1390-1391

Error diagnóstico es la “falta para establecer una explicación precisa y a tiempo de los problemas de salud del paciente”, de acuerdo con el *Institute of Medicine of the National Academies of Sciences*.<sup>1</sup> Estos errores ocurren dentro de todas las instancias de nuestro sistema de salud, entre las que se incluyen consultorios, salas de internación y salas de emergencia. Los errores diagnósticos afectan a los pacientes e implican un costo para el sistema de salud. Dentro de los reclamos por mala praxis entre 1986 y 2010, los errores diagnósticos corresponden al mayor número de reclamos.<sup>2</sup> Los errores diagnósticos frecuentemente llevaron a la muerte y a injuria permanente y originaron el mayor pago en total, sumando aproximadamente \$38,8 millones.<sup>2</sup>

En este número de *Neurology*®, Tarnutzer et al.<sup>3</sup> condujeron un meta-análisis sistemático de 23 estudios en los que se reportan fallas en el diagnóstico de eventos cerebrovasculares en pacientes que se presentaron en departamentos de emergencia (DE) entre 1995 y 2016. Incluyeron 15.721 pacientes en el análisis final del estudio, con una alta sensibilidad y especificidad para la etiología cerebrovascular sospechada. El error diagnóstico ocurrió más frecuentemente en aquellos con alteraciones leves en el estado mental o síntomas inespecíficos o transitorios. La tasa global de error diagnóstico fue de 8,7%. Tal vez no sea sorprendente que el análisis de subgrupos haya revelado que el error diagnóstico ocurrió más comúnmente en pacientes con manifestaciones menos obvias de enfermedades cerebrovasculares.

Como en todo meta-análisis, la heterogeneidad de los estudios incluidos influyó los resultados: la falta de definiciones estandarizadas de error diagnóstico, los sesgos, tanto de selección de la población de estudio como de factores confundidores, y seguimiento. El tiempo de reconocimiento del error diagnóstico permanece poco claro, y limita la aplicación práctica del estudio. La restricción del análisis sólo a los DE no incluye al paciente internado y al paciente ambulatorio, donde las tasas de error diagnóstico pueden de

hecho ser mayores.<sup>4</sup> Expandir el alcance de futuros análisis a estos escenarios aportará más utilidad clínica.

A pesar de estas limitaciones, Tarnutzer et al. nos dan la mayor cohorte a la fecha para identificar errores diagnósticos cerebrovasculares y resaltan un problema importante relevante para todos los neurólogos y trabajadores de DE. Sus hallazgos identifican subgrupos con alto riesgo de sufrir errores diagnósticos o falta de diagnóstico, que incluyen minorías, mujeres y pacientes jóvenes, trayendo a la luz disparidades en el cuidado de la salud y originando preguntas relacionadas con la incidencia del sesgo del tratante en el diagnóstico/tratamiento de subgrupos de población con infarto cerebral. Identificando estos subgrupos de alto riesgo, Tarnutzer et al. aportan evidencia sobre la necesidad de intervenciones específicas para reducir las tasas de errores diagnósticos en estos grupos.

A medida que se amplían los avances técnicos en neuroimágenes, la utilización de TC de alta resolución y secuencias rápidas RM adaptadas para el infarto cerebral isquémico agudo será algo rutinario. Shah et al.<sup>5</sup> demostraron en el estudio *Screening with MRI for Accurate and Rapid Stroke Treatment* (SMART) que no sólo es factible hacer el *screening* con RM para un infarto cerebral isquémico agudo con tiempos comparables a los de la TC, sino que la información adicional aportada puede ayudar a identificar con precisión infartos leves y excluir condiciones que imitan al infarto cerebral. Sin embargo, la imagen de alta calidad por sí sola no va a resolver el dilema del error diagnóstico. La decisión de utilizar las imágenes depende de la sospecha clínica y la alerta de la posible enfermedad. Todavía se necesitan nuevos protocolos para mejorar la precisión diagnóstica y que sea costo-efectiva. Los clínicos deben reconocer su propio sesgo de conocimiento al realizar diagnósticos médicos. El sesgo heurístico y la excesiva confianza inconsciente del diagnóstico médico cumplen un rol mayor en los errores diagnósticos, subrayando la necesidad esencial de entender, reconocer y combatir estos sesgos.<sup>6</sup>

Del Department of Neurology (A.B., G.V.H.), Brigham and Women's Hospital; y el Department of Neurology (A.B.), Massachusetts General Hospital, Harvard Medical School, Boston.

Ir a [Neurology.org](http://Neurology.org) para declaraciones de intereses completas. La información sobre fondos y aquellas declaraciones relevantes para los autores, si existiesen, se encuentran al final del artículo.

¿Entonces a dónde vamos a partir de ahora? Tarnutzer et al. han tomado un paso importante, enfatizando la necesidad de medir sistemáticamente los errores diagnósticos, particularmente en estos subgrupos de pacientes con mayor riesgo. Como parte de la subespecialidad con la mayor cantidad de pacientes en riesgo de ser mal diagnosticados en el DE, los profesionales dedicados a cuidados neurológicos agudos deberían ser particularmente alertados. Estudios previos han intentado atacar estos errores, y se desplegaron escalas adaptadas y exámenes clínicos para mejorar la sensibilidad y especificidad del diagnóstico de infarto cerebral. La implementación de escalas específicas diseñadas para ayudar a identificar pacientes con infarto cerebral, como la escala *Recognition of Stroke in the Emergency Room* (ROSIER), ha mejorado la especificidad del diagnóstico, pero depende del médico y su entrenamiento.<sup>7</sup> De forma similar, los exámenes desarrollados para ser utilizados en la cabecera del paciente pueden mejorar la confiabilidad del diagnóstico de infarto cerebral, y Kattah et al.<sup>8</sup> desarrollaron el grupo de pruebas *Head Impulse Nystagmus Test of Skew* (HINTS) para evaluar el grupo de pacientes de alto riesgo con síntomas de circulación posterior con mareo agudo. Sin embargo, estas estrategias están limitadas por el entrenamiento del médico y por el sesgo de conocimiento del diagnóstico médico.

Con el riesgo de la sobresimplificación, tal vez los primeros pasos más costo-efectivos incorporarán el uso de “*checklists*” o soporte electrónico para el registro de decisiones médicas para pacientes de mayor riesgo en el DE que se presenten con mareos, cefalea o alteraciones transitorias del estado mental. Las “*checklists*” tienen un rol en la reducción de la tasa de errores diagnósticos y pueden ser implementadas para estandarizar los enfoques de estos pacientes de alto riesgo.<sup>9</sup> Igualmente importante es la necesidad de un sistema diseñado para mantener un registro de los errores diagnósticos, dando una respuesta a estos y ayudando a identificar potenciales vulnerabilidades.

Al fallar en afrontar los costos económicos y de salud en aumento que generan los errores diagnósticos, nos perdemos la importante oportunidad de proveer un mejor cuidado a los pacientes y mejorar la costo-efectividad de nuestro sistema de salud.<sup>10</sup> En un campo donde las apuestas son altas y los verdaderos costos de las fallas diagnósticas son incluso más altos, los primeros

pasos se basarán en identificar métodos estandarizados para reportar con precisión y rastrear estos eventos para poder desarrollar soluciones amplias para el sistema.

### CONTRIBUCIONES DE LOS AUTORES

El Dr. Batra realizó el borrador inicial del manuscrito. El Dr. Henderson revisó el manuscrito.

### FONDOS PARA EL ESTUDIO

No se reportan fondos para este estudio.

### DECLARACIÓN DE INTERESES

Los autores no tienen nada para declarar relevante al manuscrito. Ir a [Neurology.org](http://Neurology.org) para declaraciones completas.

### BIBLIOGRAFÍA

1. McGlynn EA, McDonald KM, Cassel CK. Measurement is essential for improving diagnosis and reducing diagnostic error: a report from the institute of medicine. *JAMA* 2015;314:2501–2502.
2. Saber Tehrani AS, Lee H, Mathews SC, et al. 25-Year summary of US malpractice claims for diagnostic errors 1986–2010: an analysis from the national practitioner data bank. *BMJ Qual Saf* 2013;22:672–680.
3. Tarnutzer AA, Lee S-H, Robinson KA, Wang Z, Edlow JA, Newman-Toker DE. ED misdiagnosis of cerebrovascular events in the era of modern neuroimaging: a meta-analysis. *Neurology* 2017;88:1468–1477.
4. Bishop TF, Ryan AM, Casalino LP. Paid malpractice claims for adverse events in inpatient and outpatient settings. *JAMA* 2011;305:2427–2431.
5. Shah S, Luby M, Poole K, et al. Screening with MRI for accurate and rapid stroke treatment: SMART. *Neurology* 2015;84:2438–2444.
6. Berner ES, Graber ML. Overconfidence as a cause of diagnostic error in medicine. *Am J Med* 2008;121 (suppl):S2–S23.
7. Nor AM, Davis J, Sen B, et al. The Recognition of Stroke in the Emergency Room (ROSIER) scale: development and validation of a stroke recognition instrument. *Lancet Neurol* 2005;4:727–734.
8. Kattah JC, Talkad AV, Wang DZ, et al. HINTS to diagnose stroke in the acute vestibular syndrome: three-step bedside oculomotor examination more sensitive than early MRI diffusion-weighted imaging. *Stroke* 2009;40:3504–3510.
9. Ely JW, Graber ML, Croskerry P. Checklists to reduce diagnostic errors. *Acad Med* 2011;86:307–313.
10. Khullar D, Jha AK, Jena AB. Reducing diagnostic errors: why now? *N Engl J Med* 2015;373:2491–2493.
